# Supplementary material for: Modeling the statistical distributions of cosmogenic exposure dates from moraines
Source: Copernicus journal article supplement (doi:10.5194/gmd-3-293-2010), 2010-04-12
Supplement: Supplementary file 1 [file readme.pdf › readme.pdf]

## **Model documentation for “Modeling the statistical distributions of cosmogenic exposure dates from moraines”**

Applegate, P. J., Urban, N. M., Keller, K. K., and Alley, R. B.  
Correspondence to: P. J. Applegate (papplega@geosc.psu.edu)

### **Overview**

The codes given here are numerical models that describe the influence of moraine degradation and inheritance on the statistical distributions of cosmogenic exposure dates from glacial landforms, especially moraines. These two processes are treated in separate models, so the degradation model and the inheritance model reside in distinct files.

These codes were written in MATLAB version R2008a, and were run on an Intel-based Macintosh MacBook.

These codes were written carefully, and they have been checked for obvious errors. However, no warranty of any kind is implied. These codes may not even run on your system. The output from these codes should not be trusted without testing.

Please give proper credit if using these codes in research or teaching. Derivative works based on this code should include a reference to the original paper.

### **Included files**

#### *Model codes*

All these files are in the MATLAB .m file format. They can be read by any text editor. The freeware editor gedit will highlight the code in the same way as MATLAB's integrated editor.

| <u>File name</u>    | <u>Description</u>                                                                                                                                 |
|---------------------|----------------------------------------------------------------------------------------------------------------------------------------------------|
| degradation_model.m | Main file for degradation model; calls the function m_diffusion.m                                                                                  |
| m_diffusion.m       | Contains the part of the code that describes how moraine profiles change over time; based on a derivation prepared by Dr. Nathan Urban, Penn State |
| inheritance_model.m | Main file for inheritance model                                                                                                                    |

#### *Representative output*

These files are in .csv (Comma Separated Values) format. Many of these files are too large to open in Microsoft Excel. Note that the values in these files have been rounded to 5 significant figures.

In the file names, the independent variable or variables are shown in parentheses, and the dependent variables are outside the parentheses. In the files themselves, the first column contains the independent variable, and the second column contains the dependent variable. Where there is more than one independent variable, the first few columns contain their values; the order corresponds to the order of the variable names in parentheses in the file names.

Thus, in the file `naive_age(initial_depth).csv`, the first column contains the initial depth values, and the second column contains the naive age values. In the file `naive_age(pre_time, pre_depth).csv`, the first column is `pre_time`, the second column is `pre_depth`, and the third is `naive_age`.

| <u>File name</u>                                                                                                                                                                                 | <u>Description</u>                                                                                                                                                                                                                                                              |
|--------------------------------------------------------------------------------------------------------------------------------------------------------------------------------------------------|---------------------------------------------------------------------------------------------------------------------------------------------------------------------------------------------------------------------------------------------------------------------------------|
|                                                                                                                                                                                                  |                                                                                                                                                                                                                                                                                 |
| Degradation model                                                                                                                                                                                |                                                                                                                                                                                                                                                                                 |
| <code>naive_age(initial_depth).csv</code>                                                                                                                                                        | Cosmogenic exposure dates generated by the degradation model for representative parameter values (see below). These exposure dates are represented as a function of the boulders' initial depths within the moraine.                                                            |
| <code>initial_profile(distances).csv</code><br><code>final_profile(distances)_5ka.csv</code><br><code>final_profile(distances)_10ka.csv</code><br><code>final_profile(distances)_20ka.csv</code> | Elevation of a degrading moraine's surface above its base as a function of distance from the moraine's crest, at elapsed times of 0 ka, 5 ka, 10 ka, and 20 ka.                                                                                                                 |
| <code>crest_height(times).csv</code>                                                                                                                                                             | Height of a degrading moraine's crest above its base as a function of elapsed time, up to 20 ka.                                                                                                                                                                                |
|                                                                                                                                                                                                  |                                                                                                                                                                                                                                                                                 |
| Inheritance model                                                                                                                                                                                |                                                                                                                                                                                                                                                                                 |
| <code>naive_age(pre_time, pre_depth).csv</code>                                                                                                                                                  | Cosmogenic exposure dates generated by the inheritance model for representative parameter values (see below). These exposure dates are represented as a function of the boulders' predepositional exposure times and their burial depths within the landscape during that time. |

## The moraine degradation model (degradation\_model.m)

### Input parameters

The user-adjustable input parameters are contained in the same file as the model code, degradation\_model.m. The values of these parameters are defined in lines 31-87.

| Name           | Line | Default value                                                       | Symbol in text of paper | Description                                                                                                                                                                                                                                                                                                             |
|----------------|------|---------------------------------------------------------------------|-------------------------|-------------------------------------------------------------------------------------------------------------------------------------------------------------------------------------------------------------------------------------------------------------------------------------------------------------------------|
| moraine_age    | 32   | 20 ka                                                               |                         | Age of moraine (ka)                                                                                                                                                                                                                                                                                                     |
| initial_height | 33   | 50 m                                                                | $h_0$                   | Initial height of moraine (m)                                                                                                                                                                                                                                                                                           |
| initial_slope  | 34   | 34°                                                                 | $\tan^{-1}(S_0)$        | Initial slope of moraine flanks; note that the variable initial_slope is the slope angle, whereas $S_0$ in the text of the paper is the slope (rise over run). Few measurements of this parameter exist in the literature; see Hallet and Putkonen (1994), Putkonen and Swanson (2003), and Putkonen and O'Neal (2006). |
| k              | 39   | $10^{-2} \text{ m}^2/\text{yr}$<br>(range: $10^{-4}$ to $10^{-1}$ ) | $k$                     | Topographic diffusivity ( $\text{m}^2/\text{yr}$ ). See Hallet and Putkonen (1994), Hanks (2000), Putkonen and Swanson (2003), and Putkonen et al. (2007).                                                                                                                                                              |
| erosion_rate   | 42   | 0 mm/ka                                                             |                         | Erosion rate of boulders when exposed at the moraine's surface (mm/ka)                                                                                                                                                                                                                                                  |
| boulder_height | 43   | 1 m                                                                 | $h_b$                   | Minimum sampled boulder height (m). The minimum boulder height that a field geomorphologist would sample.                                                                                                                                                                                                               |
| rho_rock       | 44   | $2.6 \text{ g/cm}^3$                                                |                         | Density of the boulders ( $\text{g/cm}^3$ ); controls the $e$ -folding length of cosmic rays into the boulders.                                                                                                                                                                                                         |
| rho_till       | 45   | $2.0 \text{ g/cm}^3$                                                |                         | Density of the unconsolidated sediment surrounding the boulders; controls the $e$ -folding length of cosmic rays into the till.                                                                                                                                                                                         |
| P_spall        | 48   | $4.97 \text{ atoms }^{10}\text{Be/g/yr}$                            | $P_{i=1}$               | Production rate of cosmogenic nuclide by spallation at the earth's surface at the latitude and elevation of the study site. Get this from Balco et al. (2008), using the St scaling model.                                                                                                                              |
| P_mu           | 53   | $0.133 \text{ atoms }^{10}\text{Be/g/yr}$                           | $\Sigma(P_{i=2,3,4})$   | Production rate of cosmogenic nuclide by muons at the earth's surface at the latitude and elevation of the study site. Get this from Balco et al. (2008).                                                                                                                                                               |
| decay_const    | 56   | $4.67 \times 10^{-7} \text{ yr}^{-1}$ (?) for $^{10}\text{Be}$      | $\lambda$               | Decay constant of the cosmogenic nuclide. For $^{10}\text{Be}$ , this value is in dispute (Balco et al., 2008, and refs therein), but this parameter has little effect on $^{10}\text{Be}$                                                                                                                              |

|              |    |                                                                       |                                                  |                                                                                                                                                                                                                                                            |
|--------------|----|-----------------------------------------------------------------------|--------------------------------------------------|------------------------------------------------------------------------------------------------------------------------------------------------------------------------------------------------------------------------------------------------------------|
|              |    |                                                                       |                                                  | exposure dating over the time scales of interest ( $10^2$ - $10^5$ yr).                                                                                                                                                                                    |
| P_slhl       | 59 | [5, 0.09, 0.02, 0.02]<br>atoms<br>$^{10}\text{Be}/\text{g}/\text{yr}$ | $P_{i=1, 2, 3, 4}$                               | Surface production rates of nuclide at sea level and high latitude for various production pathways; see Granger and Muzikar (2001).                                                                                                                        |
| att_length   | 64 | [160, 738, 2688, 4360]<br>$\text{g}/\text{cm}^2$                      | material<br>density*<br>$\Lambda_{i=1, 2, 3, 4}$ | Attenuation lengths of components of the cosmic ray flux; see Granger and Muzikar (2001). In the text, $\Lambda_{i=1, 2, 3, 4}$ are these values, divided by the density (in $\text{g}/\text{cm}^3$ ) of the material the cosmic rays are passing through. |
| num_boulders | 71 | $10^5$ boulders                                                       |                                                  | Number of boulders to simulate; more boulders produce a more robust distribution of exposure dates, but also cause the model to run more slowly.                                                                                                           |
| time_step    | 75 | 25-100 yr                                                             |                                                  | Controls fineness of model discretization in time; smaller values produce more accurate results, but also cause the model to run more slowly.                                                                                                              |
| plots        | 82 | 0 or 1                                                                |                                                  | If 0, the code produces no plots; if 1, the plots described below are generated.                                                                                                                                                                           |
| bin_width    | 87 | 1-5 ka                                                                |                                                  | If plots = 1, this variable controls the widths of the bins into which the calculated exposure dates are sorted to create the histogram (see below).                                                                                                       |

### Output

The degradation model places its output into the following variables.

| <u>Name</u>     | <u>Line</u> | <u>Symbol in<br/>text of<br/>paper</u> | <u>Description</u>                                                                                              |
|-----------------|-------------|----------------------------------------|-----------------------------------------------------------------------------------------------------------------|
| initial_profile | 109         | $z(x, t = 0)$                          | Initial height of the moraine above its base as a function of distance from the crest (m).                      |
| final_profile   | 109         | $z(x, t)$                              | Final height of the moraine above its base as a function of distance from the crest (m).                        |
| crest_height    | 109         | $z(x = 0, t)$                          | Height of the moraine's crest above its base as a function of time.                                             |
| distances       | 109         | $x$                                    | A plotting variable that contains evenly spaced values of distance from the moraine crest (m).                  |
| times           | 109         | $t$                                    | A plotting variable that contains evenly spaced values of time from the beginning of the simulation (yr or ka). |
| initial_depth   | 116         | $d_0$                                  | Initial burial depth of each boulder in the moraine (m).                                                        |
| naive_age       | 171         | $t_{\text{app}}$                       | Apparent exposure time yielded by each boulder (yr or ka).                                                      |

If the variable plots is set to 1, the degradation model also produces plots of these variables. The plots show the initial and final profile of the moraine (initial\_profile and final\_profile vs. distances), the height of the moraine crest as a function of time (crest\_height vs. times), and a histogram of the exposure dates simulated by the model (naive\_age).

Numerical output from the degradation model is stored in the .csv files listed near the beginning of this document. These files generally assume a moraine age of 20 ka, an initial moraine height of 50 m, an initial slope of  $34^\circ$ , and a topographic diffusivity of  $10^{-2} \text{ m}^2/\text{yr}$ . The moraine profile for intermediate times (5 and 10 ka) is also given, assuming the other parameters have the same values.

**The inheritance model**  
(inheritance\_model.m)

*Input parameters*

Many of the inheritance model's parameters are the same as those used in the degradation model.

| <u>Name</u>   | <u>Line</u> | <u>Default value</u>                                             | <u>Symbol in text of paper</u>          | <u>Description</u>                                                                                                                                                                                                                                                                |
|---------------|-------------|------------------------------------------------------------------|-----------------------------------------|-----------------------------------------------------------------------------------------------------------------------------------------------------------------------------------------------------------------------------------------------------------------------------------|
| moraine_age   | 27          | 20 ka                                                            |                                         | Age of moraine (ka)                                                                                                                                                                                                                                                               |
| max_pre_time  | 28          | 100 ka                                                           | $\max(t_{\text{pre}})$                  | Maximum predepositional exposure time for the boulders (ka).                                                                                                                                                                                                                      |
| max_pre_depth | 30          | 2.0 m                                                            | $\max(d_{\text{pre}})$                  | Maximum predepositional burial depth for the boulders (m).                                                                                                                                                                                                                        |
| pre_slope     | 32          | 0°                                                               |                                         | Slope of surface from which preexposed boulders were derived (°).                                                                                                                                                                                                                 |
| erosion_rate  |             | 0 mm/ka                                                          |                                         | Erosion rate of boulders after being deposited on the moraine (mm/ka)                                                                                                                                                                                                             |
| rho_rock      | 36          | 2.6 g/cm <sup>3</sup>                                            |                                         | Density of the boulders (g/cm <sup>3</sup> ); controls the <i>e</i> -folding length of cosmic rays into the boulders.                                                                                                                                                             |
| rho_over      | 37          | 2.6 g/cm <sup>3</sup>                                            |                                         | Density of material overlying the boulders during the predepositional exposure period (g/cm <sup>3</sup> ); controls the <i>e</i> -folding length of cosmic rays into the boulders during that time.                                                                              |
| P_spall       | 42          | 4.97 atoms <sup>10</sup> Be/g/yr                                 | $P_{i=1}$                               | Production rate of cosmogenic nuclide by spallation at the earth's surface at the latitude and elevation of the study site. Get this from Balco et al. (2008), using the St scaling model.                                                                                        |
| P_mu          | 47          | 0.133 atoms <sup>10</sup> Be/g/yr                                | $\Sigma(P_{i=2,3,4})$                   | Production rate of cosmogenic nuclide by muons at the earth's surface at the latitude and elevation of the study site. Get this from Balco et al. (2008).                                                                                                                         |
| decay_const   | 50          | 4.67* 10 <sup>-7</sup> yr <sup>-1</sup> (?) for <sup>10</sup> Be | $\lambda$                               | Decay constant of the cosmogenic nuclide. For <sup>10</sup> Be, this value is in dispute (Balco et al., 2008, and refs therein), but this parameter has little effect on <sup>10</sup> Be exposure dating over the time scales of interest (10 <sup>2</sup> -10 <sup>5</sup> yr). |
| P_slhl        | 53          | [5, 0.09, 0.02, 0.02] atoms <sup>10</sup> Be/g/yr                | $P_{i=1,2,3,4}$                         | Surface production rates of nuclide at sea level and high latitude for various production pathways; see Granger and Muzikar (2001).                                                                                                                                               |
| att_length    | 58          | [160, 738, 2688, 4360] g/cm <sup>2</sup>                         | material density* $\Lambda_{i=1,2,3,4}$ | Attenuation lengths of components of the cosmic ray flux; see Granger and Muzikar (2001). In the text, $\Lambda_{i=1,2,3,4}$ are                                                                                                                                                  |

|              |    |                 |  |                                                                                                                                                      |
|--------------|----|-----------------|--|------------------------------------------------------------------------------------------------------------------------------------------------------|
|              |    |                 |  | these values, divided by the density (in $\text{g/cm}^3$ ) of the material the cosmic rays are passing through.                                      |
| num_boulders | 65 | $10^5$ boulders |  | Number of boulders to simulate; more boulders produce a more robust distribution of exposure dates, but also cause the model to run more slowly.     |
| plots        | 71 | 0 or 1          |  | If 0, the code produces no plots; if 1, the plots described below are generated.                                                                     |
| bin_width    | 76 | 2-10 ka         |  | If plots = 1, this variable controls the widths of the bins into which the calculated exposure dates are sorted to create the histogram (see below). |

### *Output*

The inheritance model places its output into the following variables.

| <u>Name</u> | <u>Line</u> | <u>Symbol in<br/>text of<br/>paper</u> | <u>Description</u>                                         |
|-------------|-------------|----------------------------------------|------------------------------------------------------------|
| pre_time    | 99          | $t_{\text{pre}}$                       | Predepositional exposure time of each boulder (yr).        |
| pre_depth   | 100         | $d_{\text{pre}}$                       | Predepositional burial depth of each boulder (m).          |
| naive_age   | 118         | $t_{\text{app}}$                       | Apparent exposure time yielded by each boulder (yr or ka). |

If the variable plots is set to 1, the model produces a histogram of the apparent exposure times.

Numerical output from the inheritance model is stored in the .csv file listed near the beginning of this document. This file assumes a moraine age of 20 ka, a maximum predepositional exposure time of 100 ka, and a predepositional burial depth of 2.0 m.
